# Supplementary material for: A sensitive and selective fluorescent probe for hydrazine with a unique nonaromatic fluorophore
Source: Royal Society of Chemistry journal article supplement (doi:10.1039/c9ra10882c), 2020-01-01
Supplement: c9ra10882c1.pdf [file c9ra10882c1.pdf]

*Electronic supplementary information for*

**A sensitive and selective fluorescent probe for hydrazine with a unique  
nonaromatic fluorophore**

Jian Liu<sup>a</sup>, Tao Li<sup>a</sup>, Shun Wang<sup>a</sup>, Qingrong Qi<sup>b</sup>, Hang Song<sup>a</sup>, Zicheng Li<sup>a</sup>, Li Yang<sup>c,\*</sup> and

Wencai Huang<sup>a,\*</sup>

<sup>a</sup> School of Chemical Engineering, Sichuan University, Chengdu 610065, P. R. China.

<sup>b</sup> West China School of Pharmacy, Sichuan University, Chengdu 610041, P. R. China.

<sup>c</sup> State Key Laboratory of Biotherapy and Cancer Center, West China Hospital, West China Medicinal School, Sichuan University, Chengdu 610041, P. R. China.

**Table of Contents**

|                                                                                        |       |
|----------------------------------------------------------------------------------------|-------|
| I. <sup>1</sup> H NMR, <sup>13</sup> C NMR and HRMS spectra of compounds               | P2-P5 |
| II. <sup>1</sup> H NMR and HRMS spectra of <b>Che-Dcv</b> in the presence of hydrazine | P6    |
| III. Cell viability assays of <b>Che-Dcv</b>                                           | P7    |

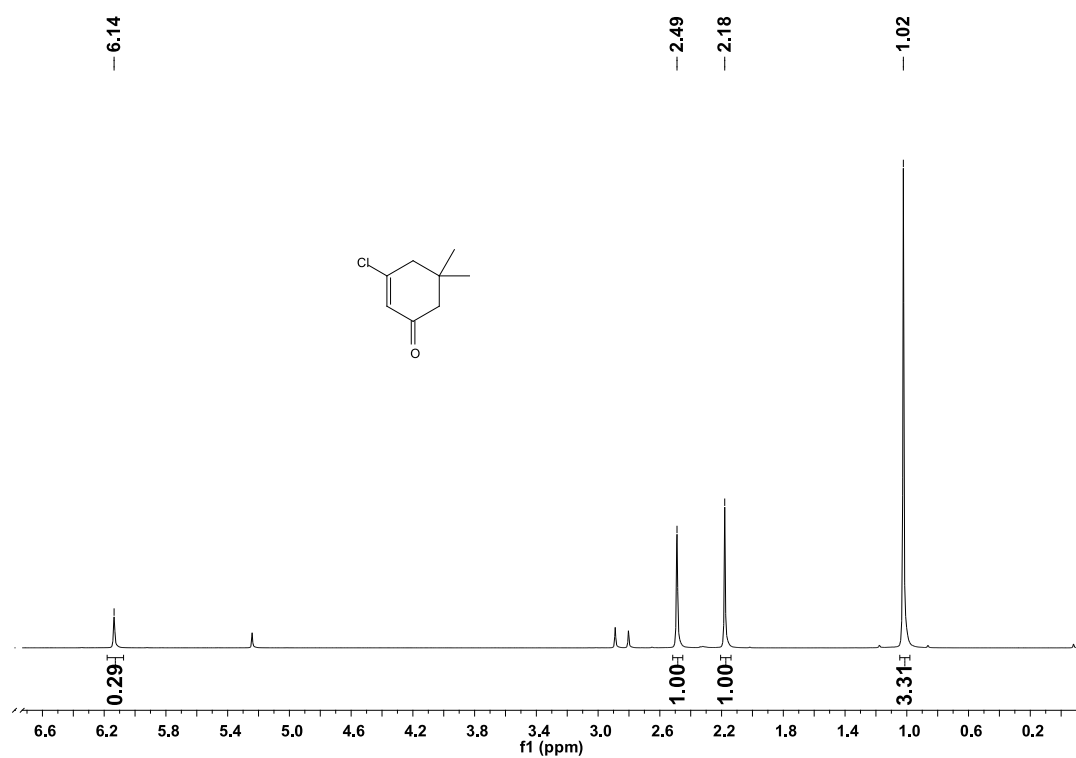

Fig. S1  $^1\text{H}$  NMR of compound **1** in  $\text{CDCl}_3$ .

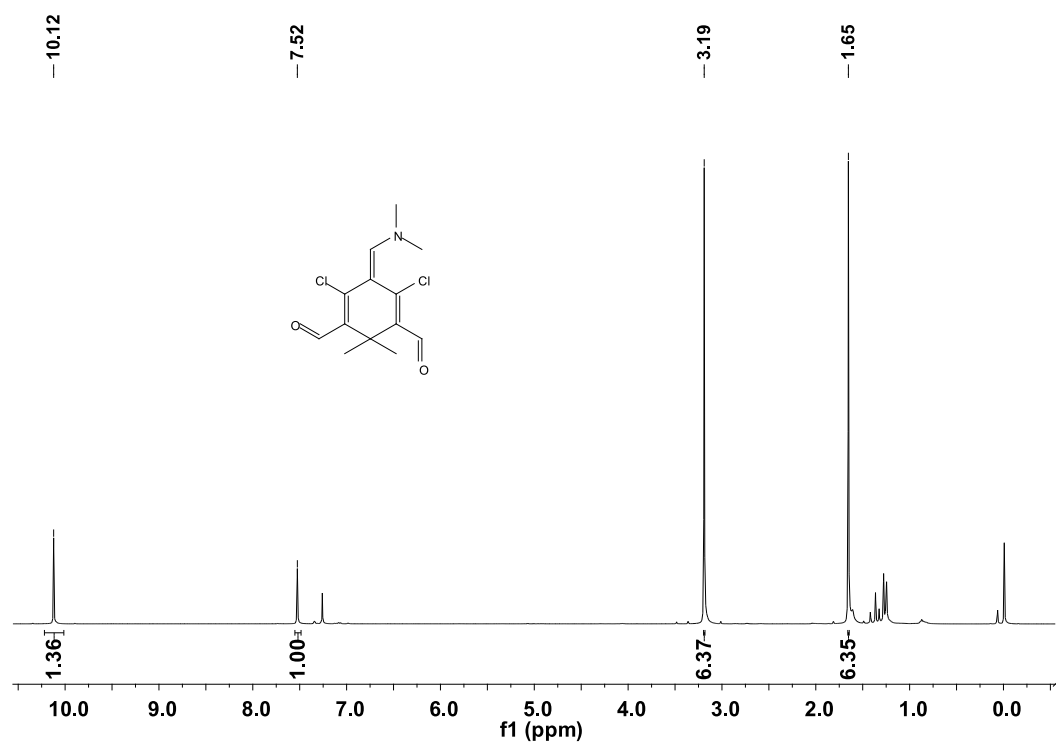

Fig. S2  $^1\text{H}$  NMR of compound **2** in  $\text{CDCl}_3$ .

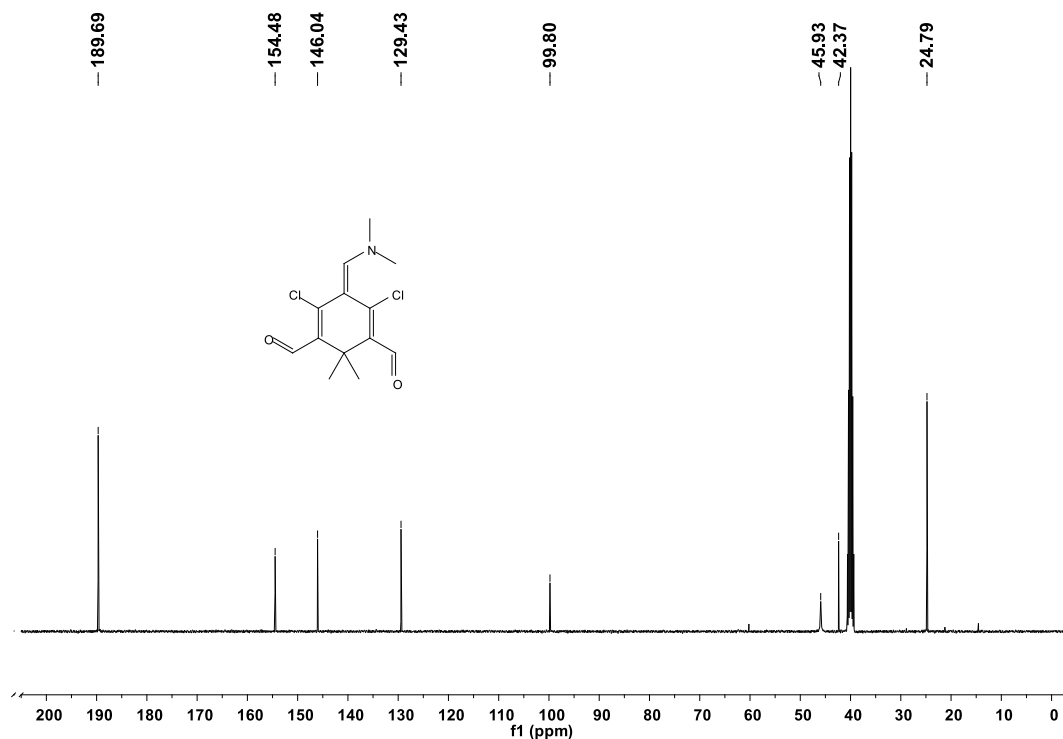

Fig. S3 <sup>13</sup>C NMR of compound 2 in DMSO-*d*<sub>6</sub>.

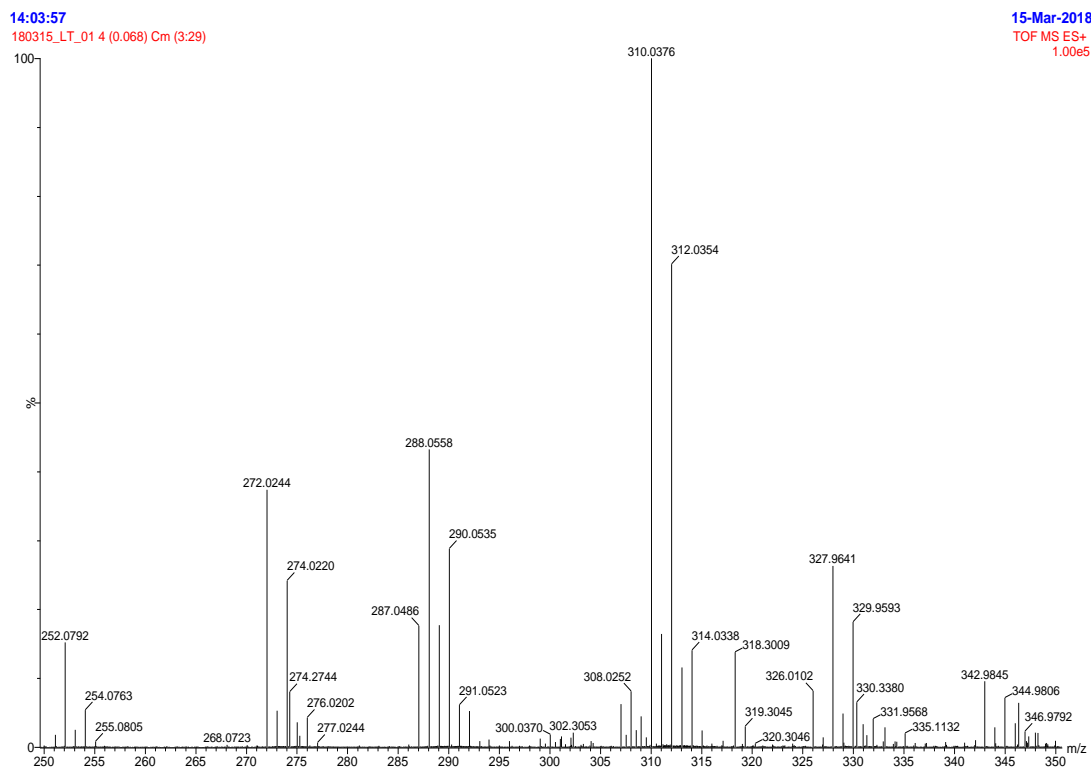

Fig. S4 HRMS of compound 2.

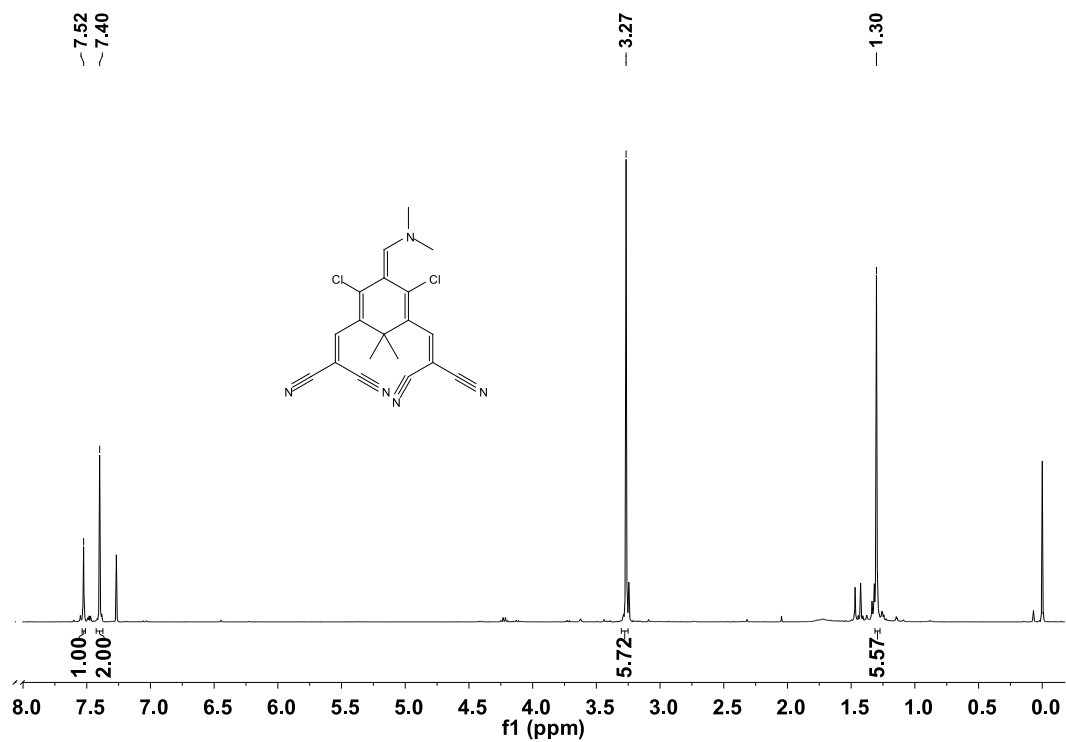

Fig. S5  $^1\text{H}$  NMR of Che-Dcv in  $\text{CDCl}_3$ .

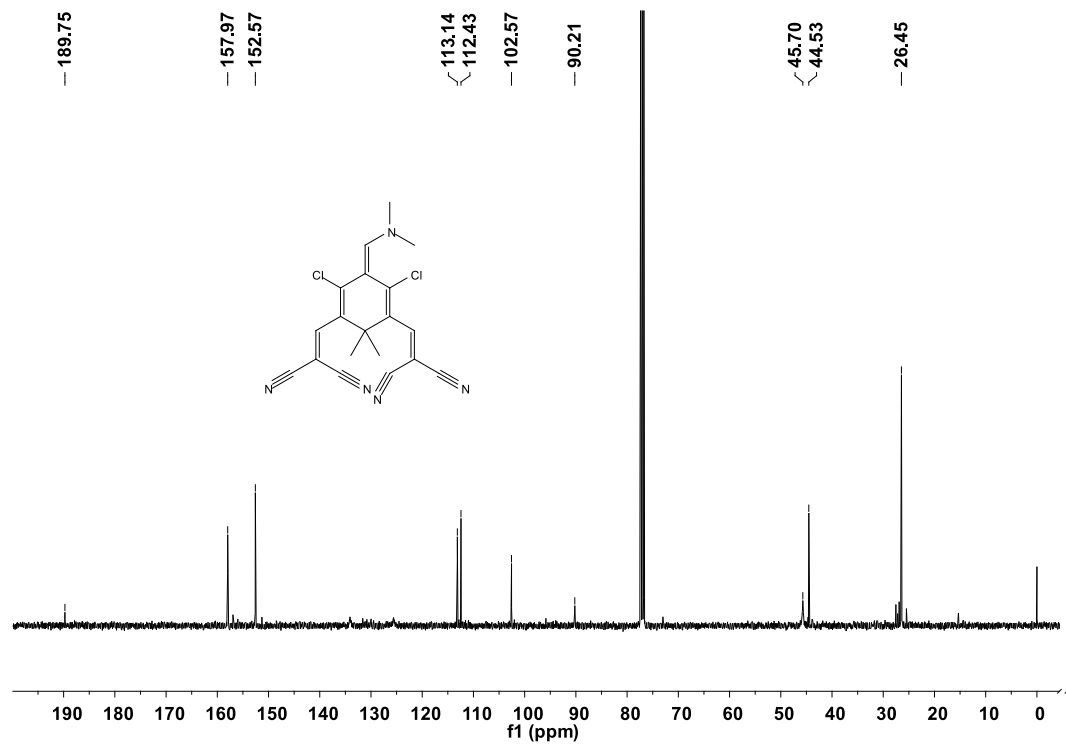

Fig. S6  $^{13}\text{C}$  NMR of Che-Dcv in  $\text{CDCl}_3$ .

16:32:13  
180920\_LT\_2\_CN 6 (0.103) Cm (3:29)

20-Sep-2018  
TOF MS ES+  
1.89e4

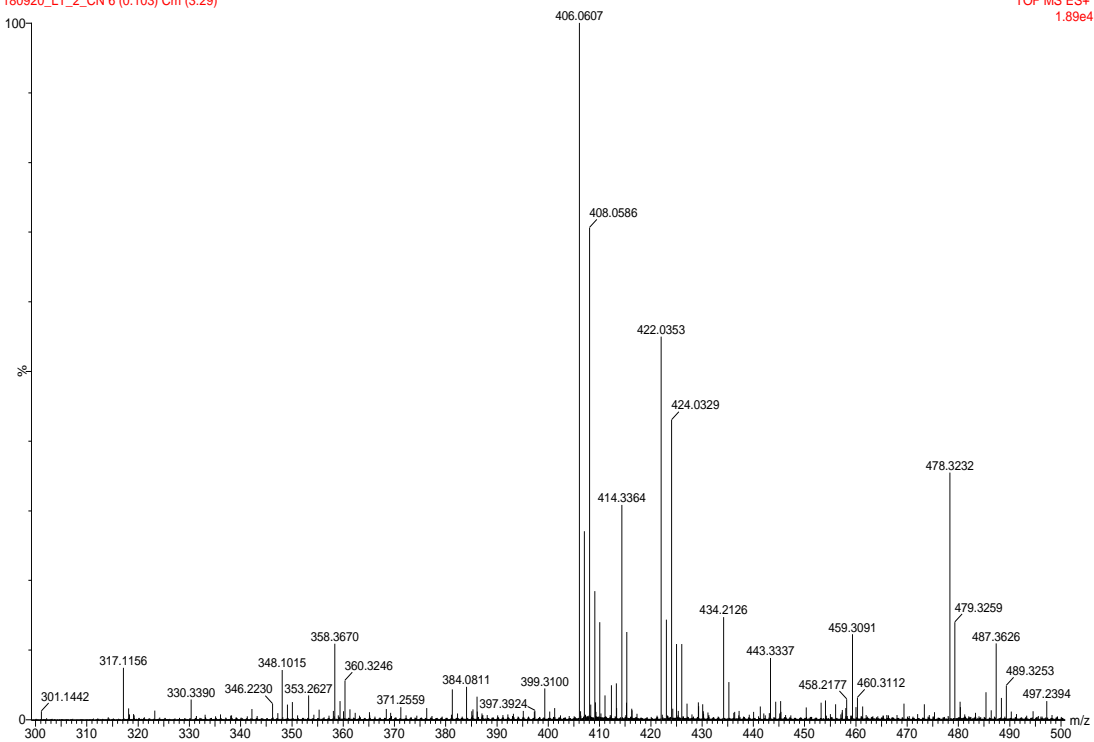

Fig. S7 HRMS of Che-Dcv.

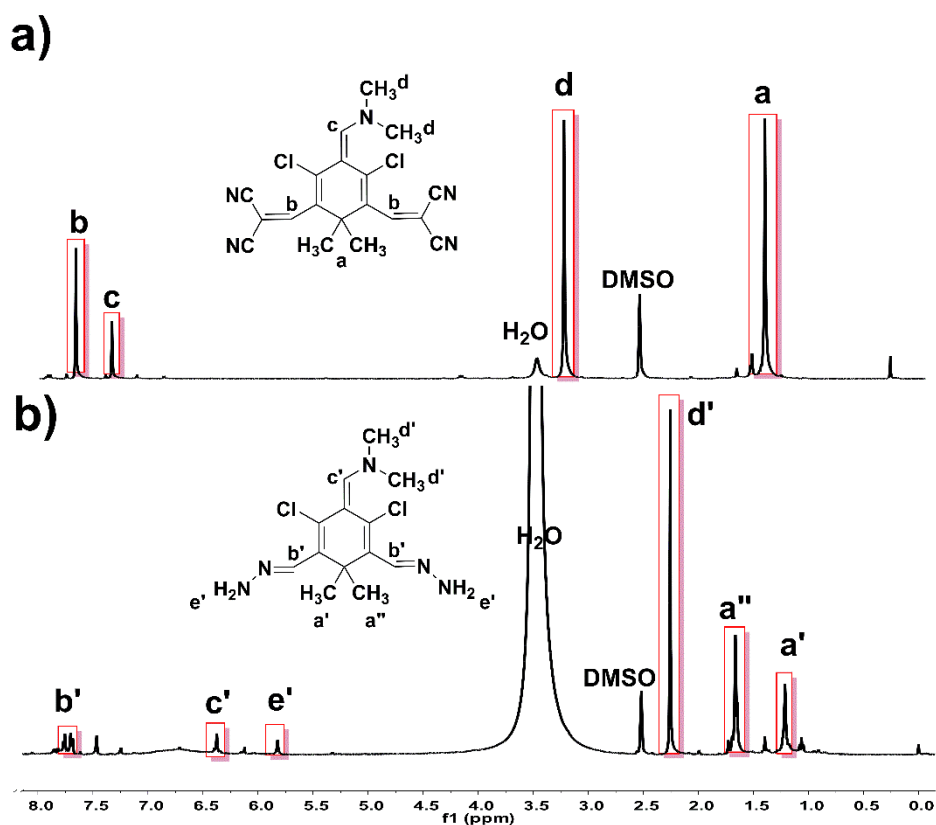

**Fig. S8**  $^1\text{H}$  NMR spectra of Che-Dcv in the absence (a) and presence (b) of  $\text{N}_2\text{H}_4$  (20 equiv) in  $\text{DMSO-}d_6$ .

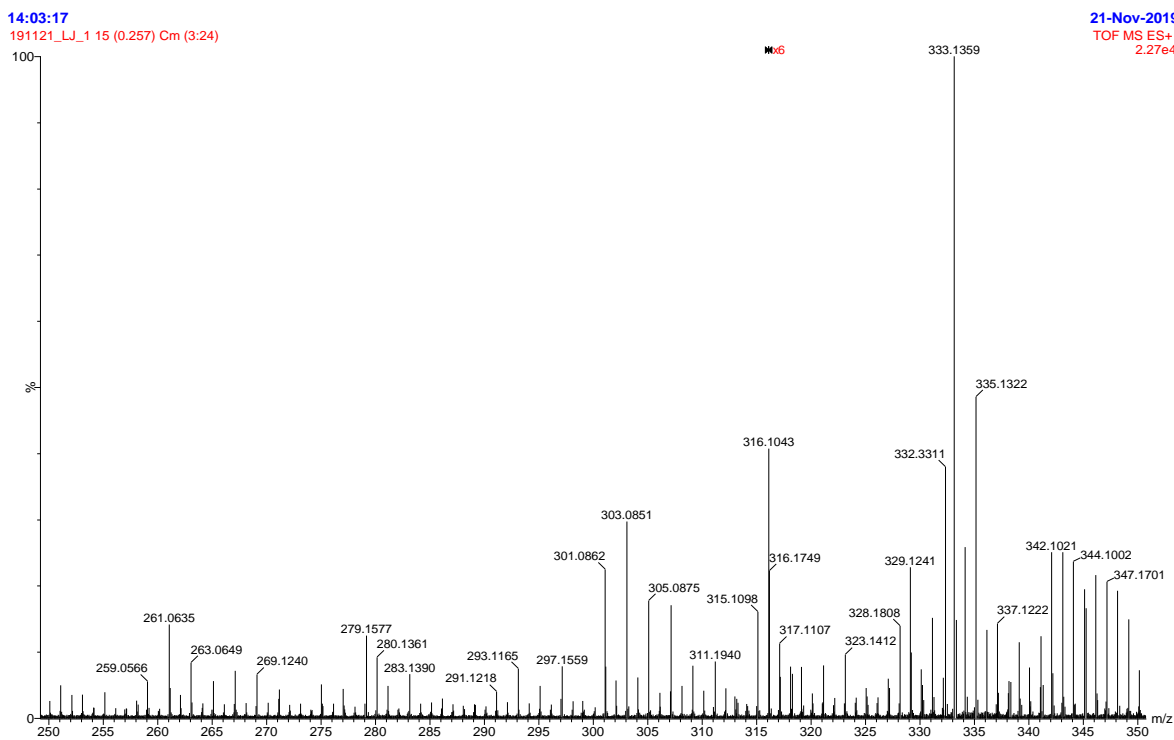

**Fig. S9** HRMS of Che-Dcv upon the addition of hydrazine.

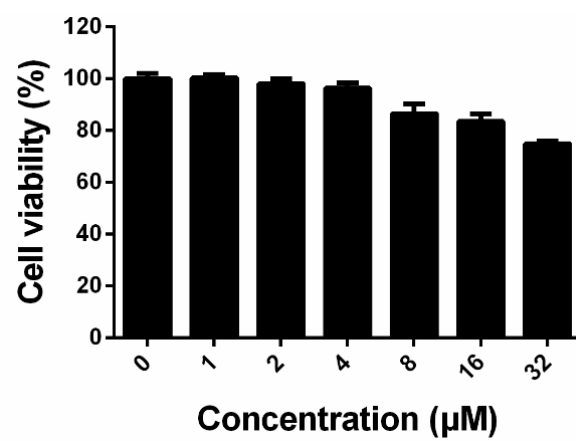

**Fig. S10** Cell viability of H1975 cells after incubation with different concentrations of **Che-Dcv** (0-32 µM) for 24 h.
